# Supplementary material for: Phytotoxicity of binary nanoparticles and humic acid on Lactuca sativa L.
Source: Royal Society of Chemistry journal article supplement (doi:10.1039/d2em00014h), 2022-01-01
Supplement: d2em00014h1.pdf [file d2em00014h1.pdf]

## Supplementary material

### Phytotoxicity of binary nanoparticles and humic acid on *Lactuca sativa* L.

**Table S1** Formulation of the 1/2 modified Hoagland nutrient solution used in the study

| Nutrient                                            | Concentration (mg/L) |
|-----------------------------------------------------|----------------------|
| KNO <sub>3</sub>                                    | 253                  |
| KH <sub>2</sub> PO <sub>4</sub>                     | 68                   |
| H <sub>3</sub> BO <sub>3</sub>                      | 3.1                  |
| CuSO <sub>4</sub> ·5H <sub>2</sub> O                | 0.0125               |
| MnSO <sub>4</sub> ·H <sub>2</sub> O                 | 8.45                 |
| KI                                                  | 0.415                |
| NH <sub>4</sub> NO <sub>3</sub>                     | 40                   |
| MgSO <sub>4</sub>                                   | 120.5                |
| CoCl <sub>2</sub> ·6H <sub>2</sub> O                | 0.0125               |
| NaFeEDTA                                            | 18.35                |
| Na <sub>2</sub> MoO <sub>4</sub> ·2H <sub>2</sub> O | 0.125                |
| ZnSO <sub>4</sub> ·7H <sub>2</sub> O                | 4.3                  |

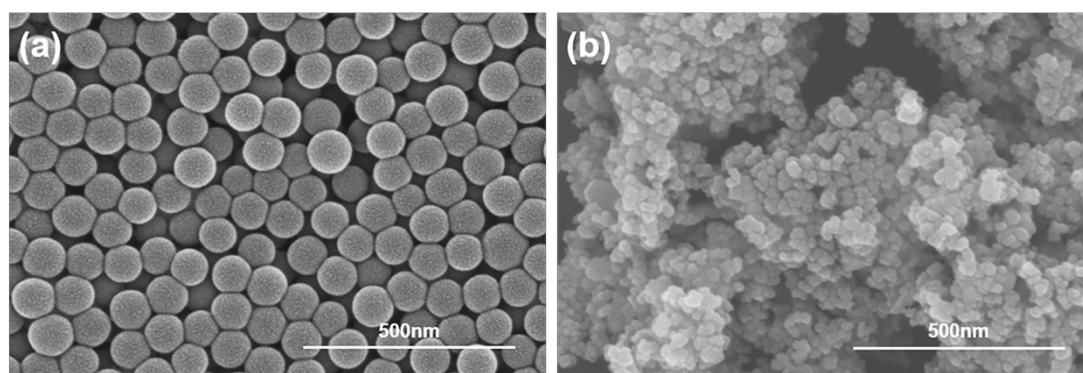

**Fig. S1** SEM images of pristine PS NPs (a) and Fe<sub>2</sub>O<sub>3</sub> NPs (b) in a hydroponic medium.
